# Supplementary material
Source: publisher figshare collection journal article supplement (https://acs.figshare.com/ndownloader/files/4275432)
Supplement: Supplementary file 1 [file 4275432]

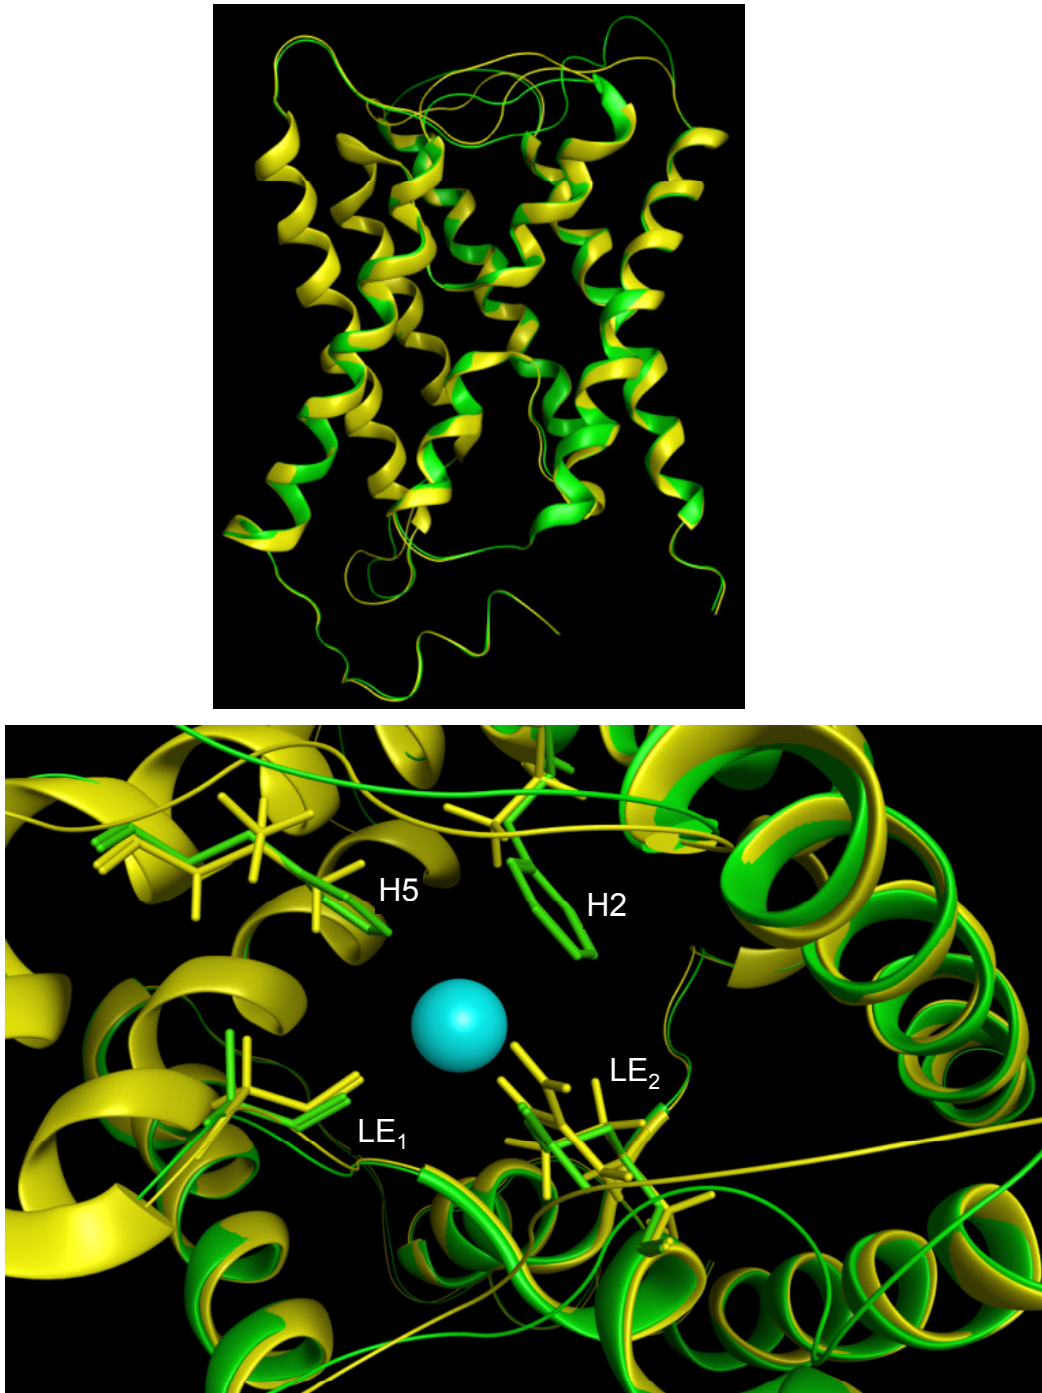

**Supplementary Figure 2. Comparison of the AtNIP7;1 Homology Model with the AQP0 structure** Superimposition of the monomeric experimental AQP0 (1YMG ) structure (green) and the AtNIP7;1 model (yellow) generated by MOE. **Top panel**, viewed perpendicular to the axis of the transport pore with the extracellular side of the membrane at the top of the structures. **Bottom panel**, viewed down the transport pore axis from the extracellular face of the membrane. The positions of the four ar/R residues of are indicated. The transported water bound to the ar/R based on the AQP0 structure is indicated by an aqua sphere.
